# Supplementary material for: Core substituted naphthalene diimide – metallo bisterpyridine supramolecular polymers: synthesis, photophysics and morphology
Source: Royal Society of Chemistry journal article supplement (doi:10.1039/c4dt02719a), 2014-12-22

**Supporting Information for Core Substituted Naphthalene Diimide – Metallo  
Bisterpyridine Supramolecular Polymers: Synthesis, Photophysics and Morphology**

Hamideh Shokouhi Mehr,<sup>‡</sup> Natalie C. Romano,<sup>‡</sup> Rashid Altamimi,<sup>†</sup> Jody M. Modarelli,<sup>§</sup> David A.  
Modarelli<sup>‡,\*</sup>

<sup>‡</sup>Department of Chemistry and The Center for Laser and Optical Spectroscopy, Knight Chemical  
Laboratory, The University of Akron, Akron, Ohio 44325-3601, United States

<sup>§</sup>Department of Chemistry and Biochemistry, Hiram College, Hiram, Ohio 44234, United States

<sup>†</sup>Petrochemicals Research Institute, King Abdulaziz City for Science and Technology, P.O. Box  
6086, Riyadh 11442, Saudi Arabia

**8 PAGES**

**TABLE OF CONTENTS**

- 1) SEM (a), TEM (b) and AFM (c) images of **5-Ru** showing the rod-shaped structures formed upon deposition onto a solid support (Figure S1).
- 2) SEM (a), TEM (b) and AFM (c) images of **5-Fe** showing the rod-shaped structures formed upon deposition onto a solid support (Figure S2).
- 3) SEM (a), TEM (b) and AFM (c) images of **5-Co** showing the short rod-shaped structures formed upon deposition onto a solid support (Figure S3).
- 4) SEM (a), TEM (b) and AFM (c) images of **7-Ru** showing the rod-shaped structures formed upon deposition onto a solid support (Figure S4).
- 5) SEM (a), TEM (b) and AFM (c) images of **7-Fe** showing the spherical and thin fiber-like structures formed upon deposition onto a solid support (Figure S5).

6) SEM (a), TEM (b) and AFM (c) images of **7-Co** showing the spherical and thin fiber-like structures formed upon deposition onto a solid support (Figure S6).

7) Fluorescence spectra of ligands **5** and **7** in DMF with excitation at  $\lambda_{\text{ex}}$  380 nm (Figure S7).

**Figure 1.** SEM (a), TEM (b) and AFM (c) images of **5-Ru** showing the rod-shaped structures formed upon deposition onto a solid support.

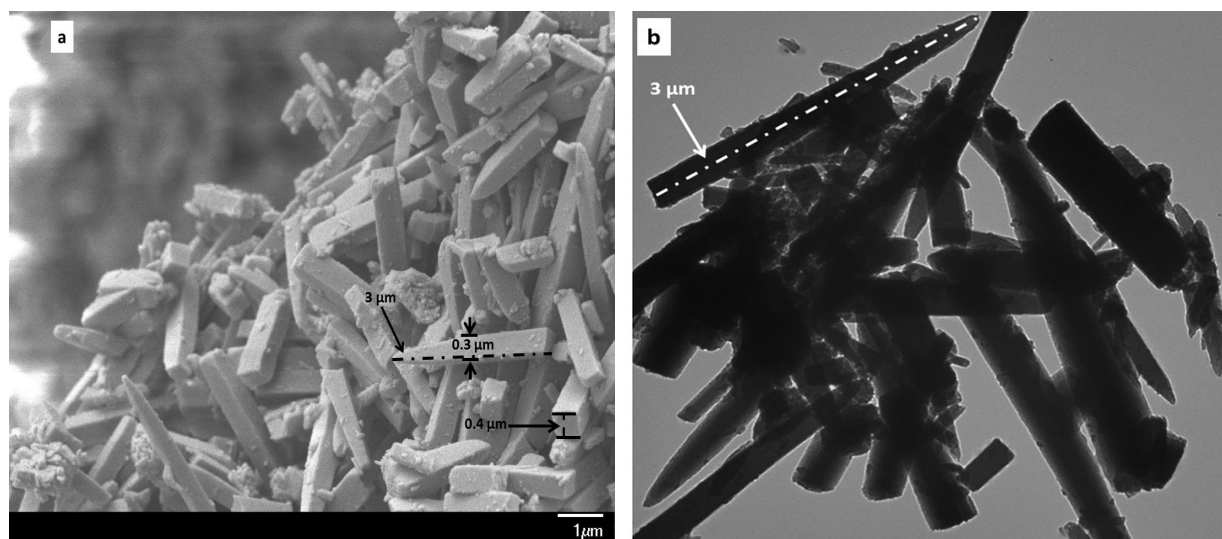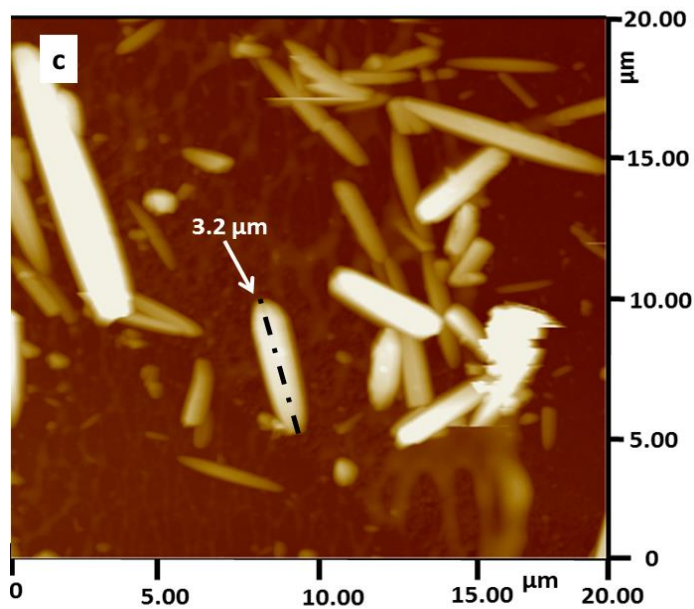

**Figure 2.** SEM (a), TEM (b) and AFM (c) images of **5-Fe** showing the rod-shaped structures formed upon deposition onto a solid support.

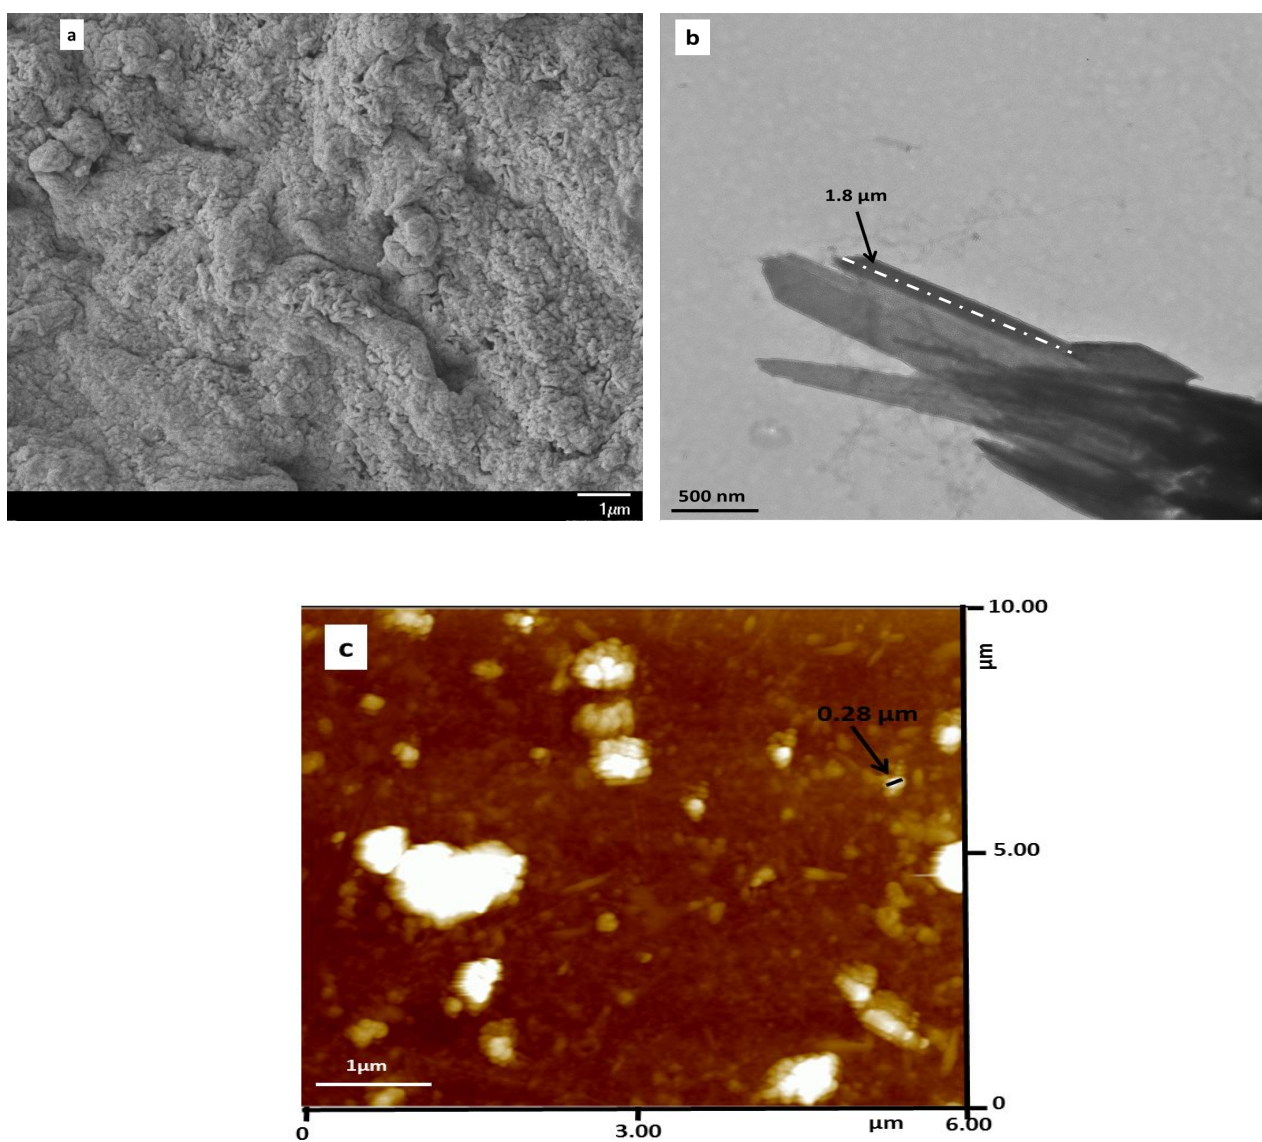

**Figure 3.** SEM (a), TEM (b) and AFM (c) images of **5-Co** showing the short rod-shaped structures formed upon deposition onto a solid support.

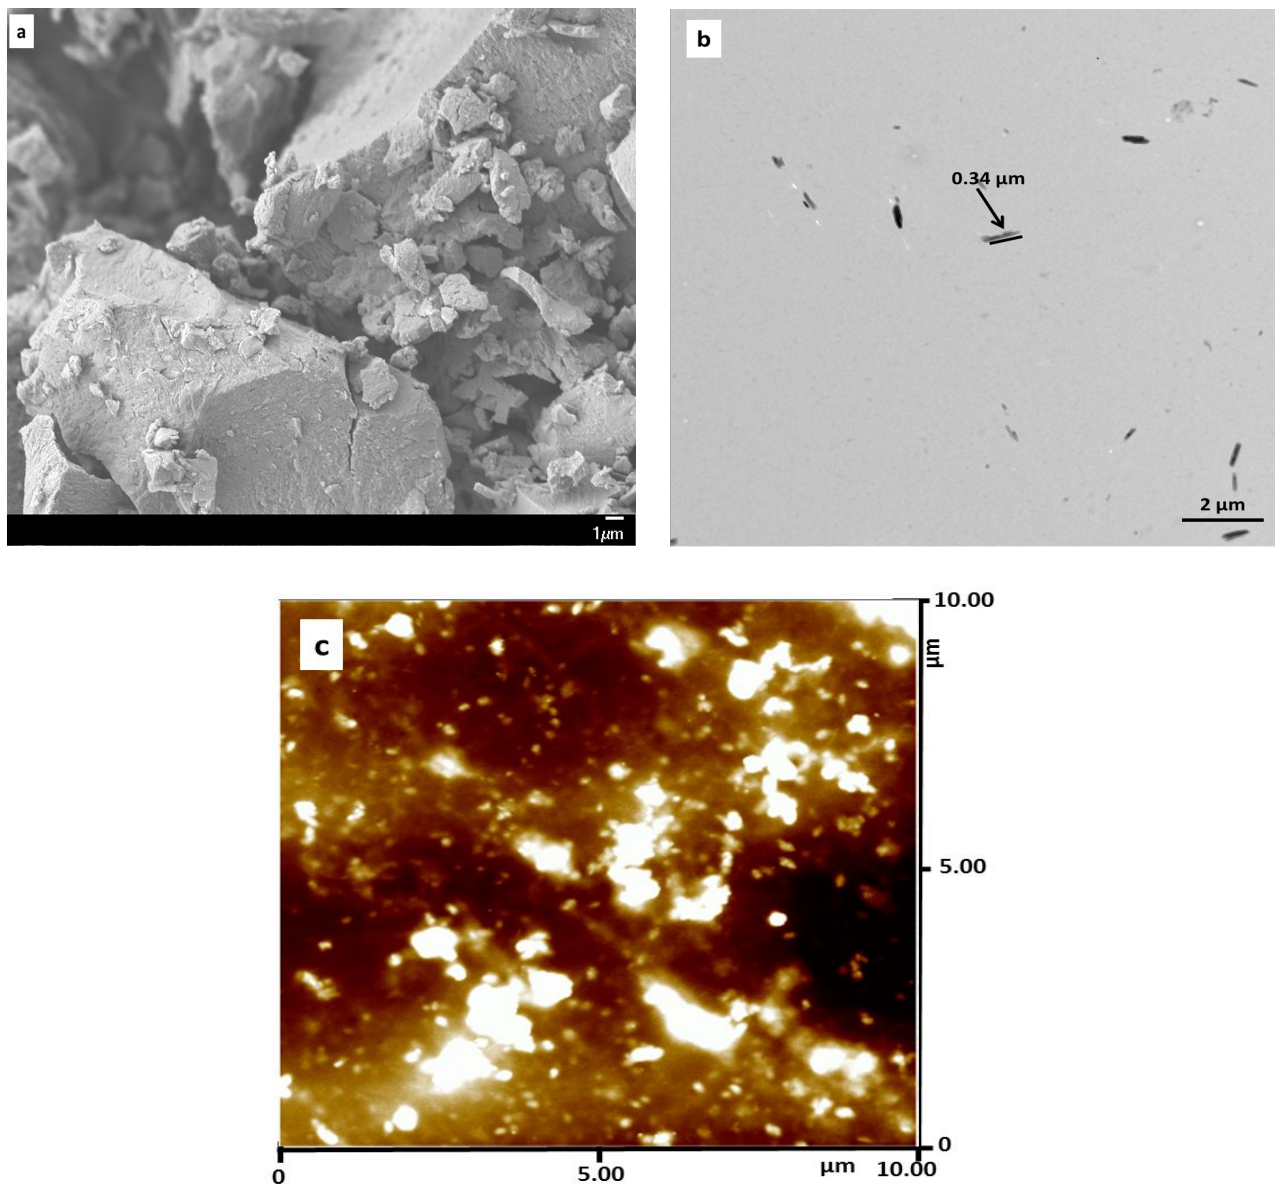

**Figure 4.** SEM (a), TEM (b) and AFM (c) images of **7-Ru** showing the rod-shaped structures formed upon deposition onto a solid support.

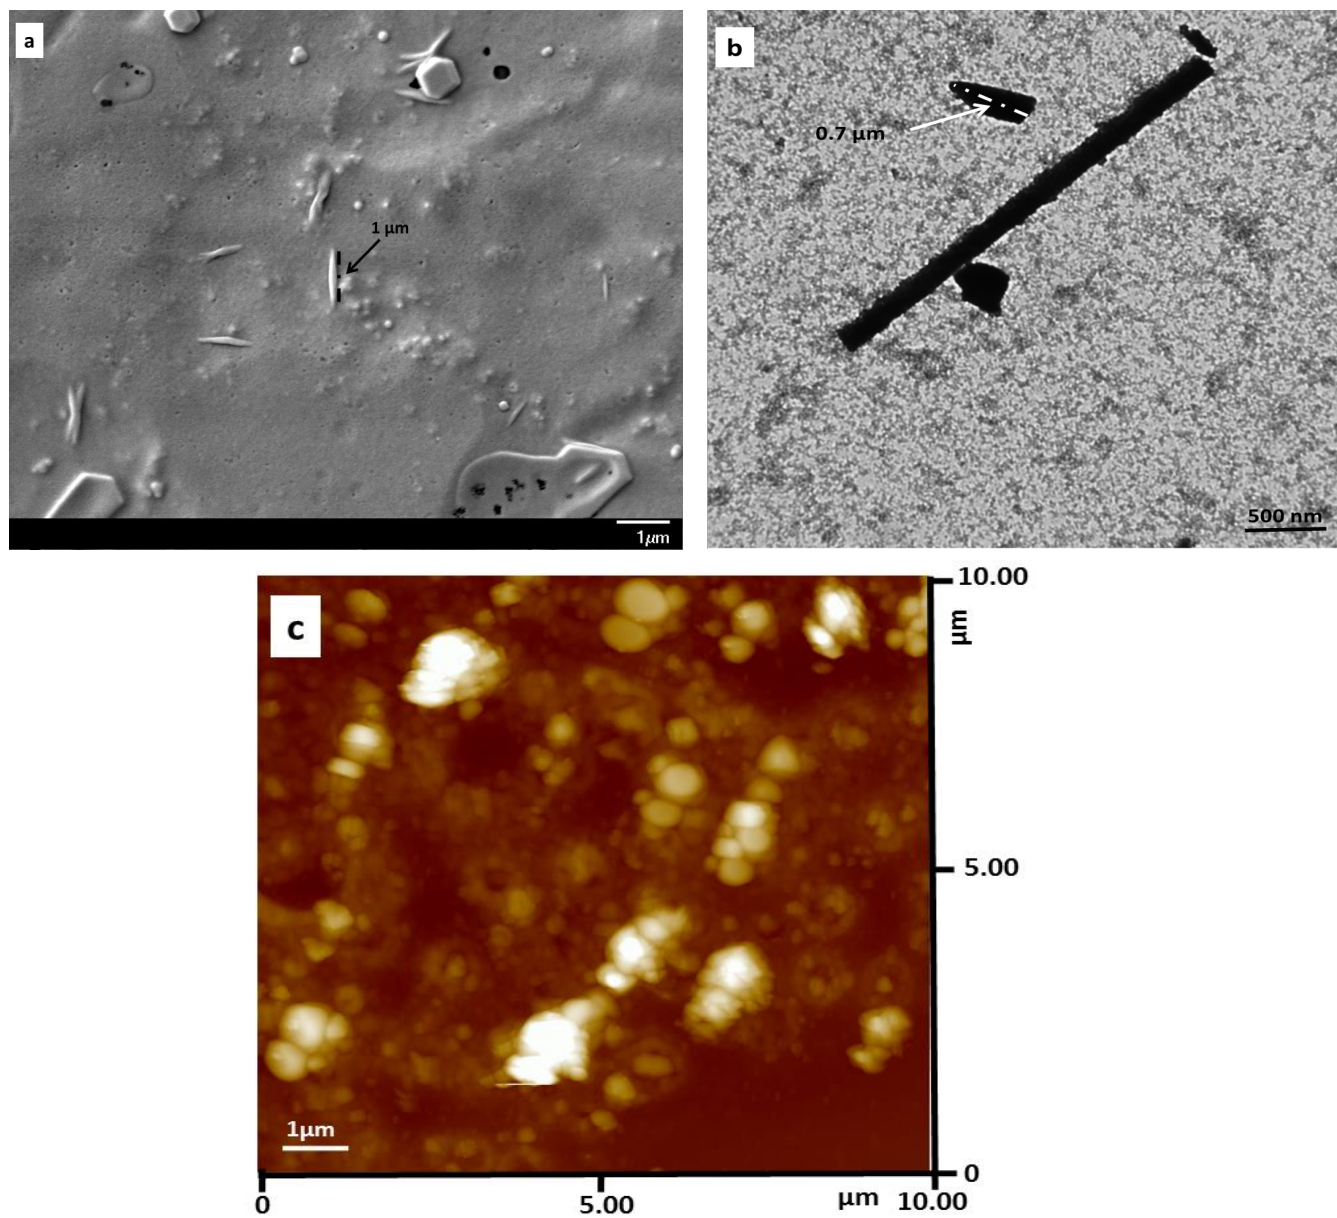

**Figure 5.** SEM (a), TEM (b) and AFM (c) images of **7-Fe** showing the spherical and thin fiber-like structures formed upon deposition onto a solid support.

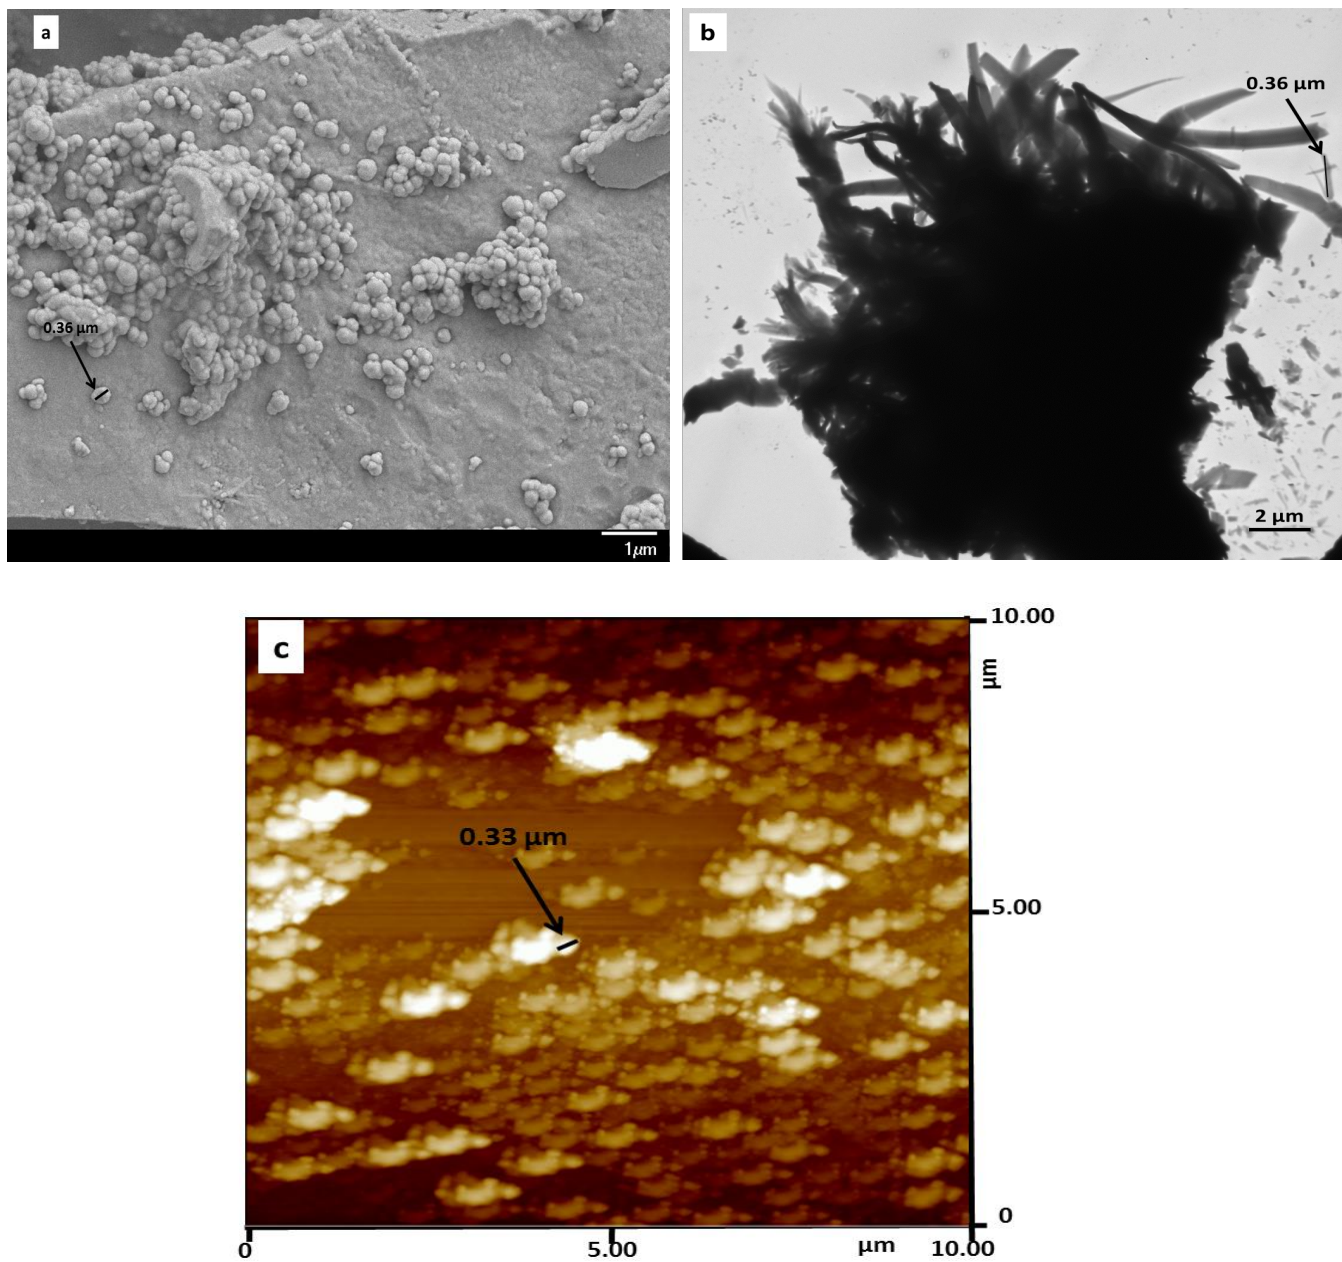

**Figure 6.** SEM (a), TEM (b) and AFM (c) images of **7-Co** showing the spherical and thin fiber-like structures formed upon deposition onto a solid support.

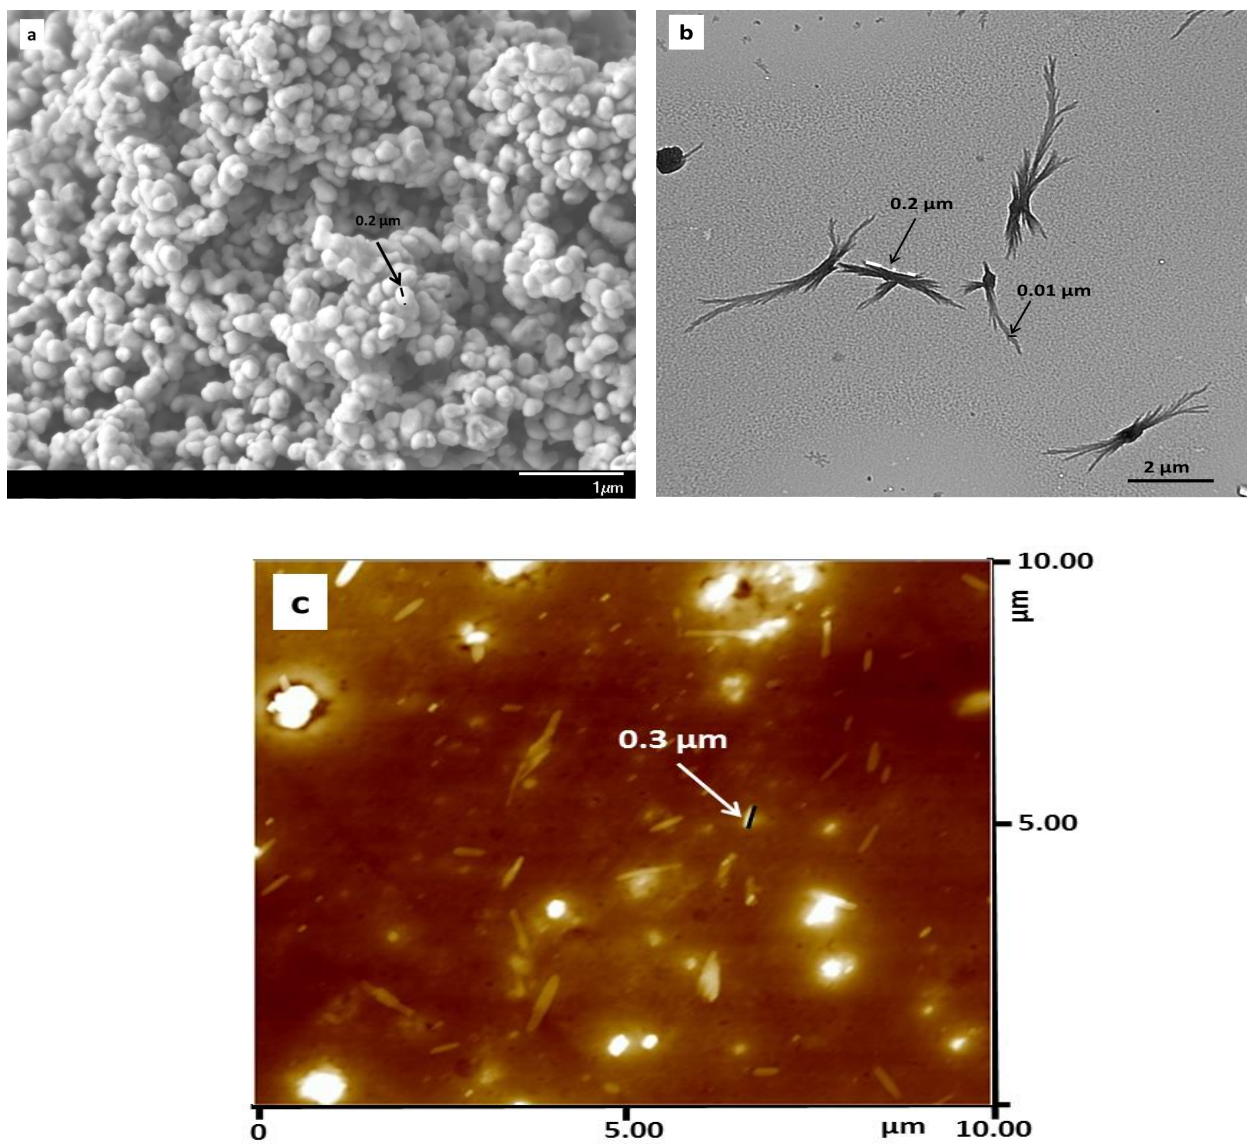

**Figure 7.** Fluorescence spectra of ligands **5** and **7** in DMF with excitation at  $\lambda_{\text{ex}}$  380 nm.

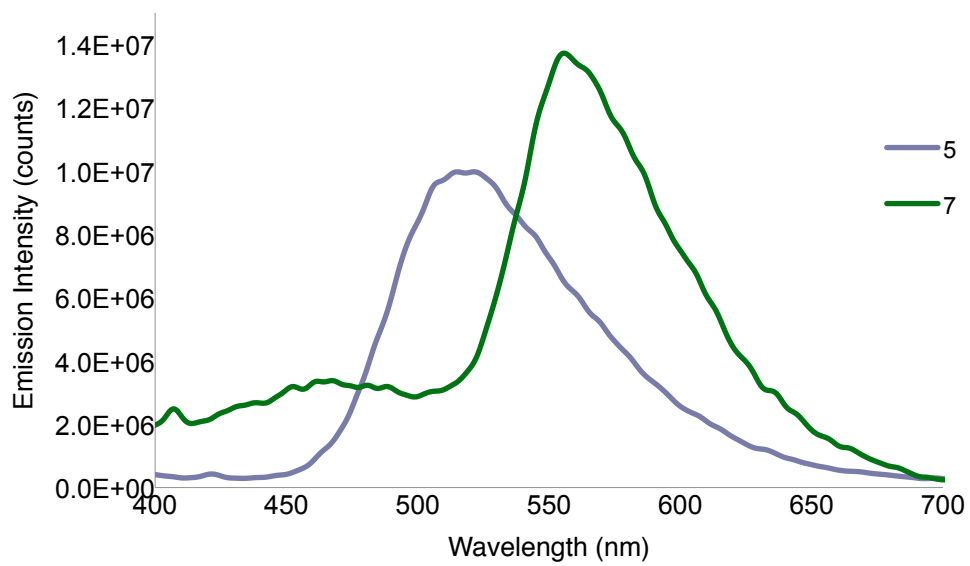

Supplement: c4dt02719a1.pdf [file c4dt02719a1.pdf]
